# Supplementary material
Source: Research Square preprint supplement (doi:10.21203/rs.3.rs-10337641/v1)
Supplement: Supplementary file 1 [file 1c90f746e64b41d55455d562.docx]

**Table of Contents:**


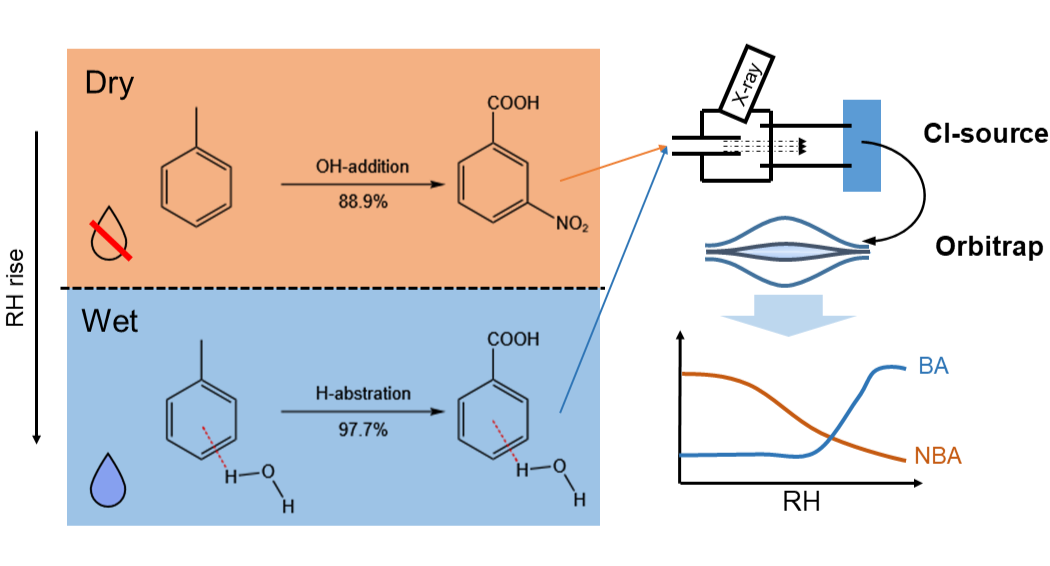


ASSOCIATED CONTENT

**Supporting Information**

Supporting information includes: instrument operation and data analysis in field observation and smog chamber; quantification of BA and NBA; quantum chemical calculation method, branching calculation; time series and fraction of different compounds; mass spectrometry of compounds; daily concentration variations of different substances; electrostatic potential maps and HOMO-LUMO of intermediates in the reaction; oxidation process from toluene to NBA; oxidation pathway of toluene; toluene and the oxidation production in different RH in chamber; the NSA/SA ratio in chamber experiment; the table of *f(RH)* and *kOH*/*kH* in different RH and different Δ*G*.
